# Supplementary material
Source: PubMed Central journal article supplement (PMC7522793)
Supplement: MD-011-C9MD00341J-s001.pdf [file MD-011-C9MD00341J-s001.pdf]

Cyrene™ is a Green Alternative to DMSO as a solvent for Antibacterial Drug Discovery against ESKAPE Pathogens

Jason E. Camp<sup>a,b</sup>, Simbarashe B. Nyamini<sup>a</sup> and Fraser J. Scott<sup>c\*</sup>

<sup>a</sup>Department of Chemical Sciences, University of Huddersfield, Queensgate, Huddersfield, U.K.

<sup>b</sup> Department of Chemistry, University of Bath, Bath, U.K.

<sup>c</sup> Department of Pure and Applied Chemistry, University of Strathclyde, Glasgow, Scotland, U.K.

### Supporting Information

|             |                                                       |           |
|-------------|-------------------------------------------------------|-----------|
| <b>I.</b>   | <b>General Experimental Information .....</b>         | <b>S2</b> |
| <b>II.</b>  | <b><sup>19</sup>F NMR assay of Levofloxacin .....</b> | <b>S2</b> |
| <b>III.</b> | <b>Determination of antibacterial activity .....</b>  | <b>S2</b> |
| <b>IV.</b>  | <b>ROS Mediated Killing.....</b>                      | <b>S2</b> |
| <b>V.</b>   | <b>References.....</b>                                | <b>S2</b> |

## I. General Experimental Information

Unless otherwise indicated, all commercially available reagents and solvents were used directly from the supplier without further purification.  $^1\text{H}$  NMR,  $^{13}\text{C}$  NMR and  $^{19}\text{F}$  NMR were recorded at ambient temperature in  $\text{CDCl}_3$  (7.27 ppm). Hexafluorobenzene (-163.0 ppm) was used as an internal standard. Chemical shift values ( $\delta$ ) are expressed as parts per million (ppm) and J values are in Hertz.

## II. $^{19}\text{F}$ NMR assay of Levofloxacin

Sample Preparation: To a mixture of levofloxacin (1.0 equiv.) in Cyrene<sup>TM</sup> (1 mL) or DMSO (1 mL) at rt was added hexafluorobenzene (0.17 equiv.) and the resultant mixture was subjected to  $^{19}\text{F}$  NMR analysis.

**Table S1:**  $^{19}\text{F}$  NMR assay of Levofloxacin dissolved in Cyrene<sup>TM</sup> or DMSO.

| Prepared Levofloxacin concentration | Detected Levofloxacin concentration |             |
|-------------------------------------|-------------------------------------|-------------|
|                                     | Cyrene <sup>TM</sup> sample         | DMSO sample |
| 1.3 mM                              | 1.3 mM                              | 1.3 mM      |
| 0.15 M                              | 0.15 M                              | 0.15 M      |

## III. Determination of antibacterial activity

The following bacterial strains were obtained from the American Type Culture Collection (ATCC; Manassas, VA, USA): *S. aureus* (ATCC 43300), *E. faecalis* (ATCC 51299), *E. coli* (ATCC 25922), *P. aeruginosa* (ATCC 27893), *A. baumannii* (ATCC 19606), *K. pneumoniae* (ATCC 700603). All antibacterial drugs were purchased from Sigma Aldrich UK.

Bacterial cultures were initiated on LB agar (Fisher, UK, Fisher BioReagents<sup>TM</sup> BP9724-500) slants, and prior to the assays, the suspensions were prepared in cation-adjusted Mueller Hinton broth (Thermo Scientific<sup>TM</sup> CM0405B, an Oxoid<sup>TM</sup> product, and supplemented with CLSI recommended divalent cations<sup>1</sup>) and incubated at 37 °C for 18 h at 100 rpm. Antimicrobial assays were performed by the broth microdilution method, in a 96-well plate format, according to the Clinical and Laboratory Standards Institute guidelines. MIC were defined as the lowest compound concentration at which no bacterial growth was visible ( $n \geq 3$ )

## IV. ROS Mediated Killing

Exponentially growing cultures of the appropriate strains were serially diluted into pre-warmed LB medium to a cell density of  $10^5$  to  $10^6$  CFU/mL. Cultures were then treated with 2 x MIC ciprofloxacin for 90 min, followed by immediate plating onto LB agar lacking or containing 2% (vol/vol) DMSO or Cyrene<sup>TM</sup>. After incubation at 37°C overnight, colonies were counted. Shown are the average values from experiments carried out three times. Error bars indicate deviations as standard errors of the mean.

## V. References

1. Clinical and Laboratory Standards Institute. Performance Standards for Antimicrobial Susceptibility Testing: Twenty-third Informational Supplement M100-S23. CLSI, Wayne, PA, USA, 2013.
